# Supplementary material for: Catalytic conversion of sucrose to 1,2-propanediol over alumina-supported Ni–Mo bimetallic catalysts
Source: Royal Society of Chemistry journal article supplement (doi:10.1039/d2se00610c), 2022-01-01
Supplement: d2se00610c1.pdf [file d2se00610c1.pdf]

## Supplementary Information

---

### Catalytic conversion of sucrose to 1,2-propanediol over alumina supported Ni-Mo bimetallic catalyst

Sreejith Sreekantan<sup>a,b</sup>, Arun Arunima Kiralja<sup>a,b</sup>, Banu Marimuthu,<sup>\*ab</sup>

<sup>a</sup>Catalysis and Inorganic Chemistry Division,  
CSIR-National Chemical Laboratory, Dr.Homi Bhabha Road, Pune-411008, India

<sup>b</sup>Academy of Scientific and Innovative Research, Ghaziabad, Uttar Pradesh- 201 002, India

**KEYWORDS** : Biomass conversion, Sugar hydrogenolysis, propylene glycol, Retro-aldol condensation, Renewable resources, Sustainability.

---

|           |                                                                                                                                                                |
|-----------|----------------------------------------------------------------------------------------------------------------------------------------------------------------|
| Table S1  | The reaction data of different Ni-Mo supported over $\gamma$ -Al <sub>2</sub> O <sub>3</sub> catalysts on sucrose substrate                                    |
| Table S2  | The optimisation of the reaction conditions using 8%Ni-20%Mo/ $\gamma$ - Al <sub>2</sub> O <sub>3</sub> catalyst.                                              |
| Table S3  | The reusability study of the catalyst 8%Ni-20%Mo/ $\gamma$ - Al <sub>2</sub> O <sub>3</sub> catalyst.                                                          |
| Table S4  | The reusability of the 8%Ni-20%Mo/ $\gamma$ - Al <sub>2</sub> O <sub>3</sub> on 2wt% sucrose at 160°C, 40bar H <sub>2</sub> , 1 h run time (at low conversion) |
| Figure S1 | The XRD patterns of the fresh and spent catalyst at low conversion and high conversion                                                                         |
| Figure S2 | The morphology of the spent catalyst after 4 runs (a & b) FE-SEM (c & d) HR-TEM                                                                                |
| Figure S3 | The py-IR spectra of various Ni-Mo/ $\gamma$ -Al <sub>2</sub> O <sub>3</sub> supported catalysts.                                                              |
| Figure S4 | The deconvoluted XPS spectrum of Mo-3d and Ni-2p of various Ni-Mo/ $\gamma$ -Al <sub>2</sub> O <sub>3</sub> supported catalysts.                               |
| Figure S5 | The HPLC chromatogram of the reaction of 8%Ni-20%Mo/ $\gamma$ -Al <sub>2</sub> O <sub>3</sub> on 2wt% sucrose at optimized reaction condition.                 |
| Figure S6 | The Calibration curve for the 1,2-propanediol for the quantification                                                                                           |

### 1. The reaction data of different Ni-Mo supported over $\gamma$ -Al<sub>2</sub>O<sub>3</sub> catalyst on sucrose substrate

**Table S1** : The optimisation of different Ni-Mo bimetallic combinations over  $\gamma$ -Al<sub>2</sub>O<sub>3</sub> support at 220°C, 40 bar H<sub>2</sub>, 4.5 h, 2 wt% Sucrose

| Entry No | Metal Loading (%) |    | Product Selectivity (%) |         |      |         |        |        |             |            |
|----------|-------------------|----|-------------------------|---------|------|---------|--------|--------|-------------|------------|
|          | Ni                | Mo | 1,2-PDO                 | 1,3-PDO | EG   | 1,2-BDO | 2-PrOH | 1-PrOH | Lactic Acid | EG+PDO+BDO |
| <b>1</b> | 6                 | 20 | 70.1                    | 1.0     | 4.1  | 15.3    | 1.0    | 1.7    | 2.2         | 90.5       |
| <b>2</b> | 10                | 20 | 67.1                    | 0.4     | 7.2  | 11.4    | 2.9    | 1.8    | 2.4         | 86.1       |
| <b>3</b> | 8                 | 20 | 72.2                    | 1.1     | 4.6  | 11.7    | 2.2    | 2.0    | 3.1         | 89.6       |
| <b>4</b> | 8                 | 15 | 61.2                    | Trace   | 2.9  | 12.0    | 8.2    | Trace  | 7.0         | 76.1       |
| <b>5</b> | 8                 | 25 | 69.4                    | 0.8     | 5.5  | 12.6    | 1.4    | 1.3    | 2.3         | 88.3       |
| <b>6</b> | 8                 | 0  | 30.4                    | 0.6     | 6.3  | 3.1     | 3.6    | ND     | 20.0        | 40.4       |
| <b>7</b> | 0                 | 20 | 15.7                    | 1.2     | 14.0 | 2.1     | 4.2    | ND     | 32.2        | 33.0       |
| <b>8</b> | 0                 | 0  | 19.9                    | 1.3     | 14.6 | 2.2     | 3.7    | ND     | 29.8        | 38.0       |

## 2. The optimisation of the reaction conditions using 8%Ni-20%Mo/ $\gamma$ - Al<sub>2</sub>O<sub>3</sub> catalysts

**Table S2:** The optimisation of the reaction conditions for active catalyst (8%Ni-20%Mo/ $\gamma$ - Al<sub>2</sub>O<sub>3</sub>) on sucrose substrate

| Entry No | Reaction Conditions |         |                         |                             |          | Product Selectivity (%) |        |     |         |             |             |
|----------|---------------------|---------|-------------------------|-----------------------------|----------|-------------------------|--------|-----|---------|-------------|-------------|
|          | T (°C)              | P (bar) | Sucrose: Catalyst Ratio | Sucrose Concentration (wt%) | Time (h) | 1,2-PD                  | 1,3-PD | EG  | 1,2-BDO | Lactic Acid | PDO+ EG+BDO |
| 1        | 220                 | 40      | 1:0.35                  | 2                           | 4.5      | 72.2                    | 1.1    | 4.6 | 11.7    | 3.1         | 89.6        |
| 2        | 200                 | 40      | 1:0.35                  | 2                           | 4.5      | 71.6                    | Trace  | 4.6 | 11.9    | 3.2         | 88.1        |
| 3        | 180                 | 40      | 1:0.35                  | 2                           | 4.5      | 73.7                    | 2.6    | 2.5 | 12.2    | 1.8         | 91.0        |
| 4        | 160                 | 40      | 1:0.35                  | 2                           | 4.5      | 46.0                    | 6.0    | 1.9 | 8.7     | Trace       | 62.6        |
| 5        | 180                 | 50      | 1:0.35                  | 2                           | 4.5      | 70.0                    | 3.2    | 5.8 | 10.8    | 2.6         | 89.8        |
| 6        | 180                 | 30      | 1:0.35                  | 2                           | 4.5      | 67.6                    | 3.9    | 4.0 | 11.6    | 3.2         | 87.1        |
| 7        | 180                 | 40      | 1:0.5                   | 2                           | 4.5      | 70.6                    | 2.6    | 4.6 | 13.1    | 2.0         | 90.9        |
| 8        | 180                 | 40      | 1:0.20                  | 2                           | 4.5      | 53.1                    | 5.6    | 3.9 | 10.5    | 6.6         | 73.1        |
| 9        | 180                 | 40      | 1:0.35                  | 2                           | 2.5      | 70.8                    | 4.1    | 2.5 | 12.9    | 2.4         | 90.3        |
| 10       | 180                 | 40      | 1:0.35                  | 2                           | 6.5      | 71.7                    | 1.8    | 3.1 | 13.6    | 2.5         | 90.2        |
| 11       | 180                 | 40      | 1:0.35                  | 5                           | 4.5      | 73.5                    | 3.7    | 1.4 | 14.3    | 3.2         | 92.9        |

### 3. The reusability study of the catalyst 8%Ni-20%Mo/ $\gamma$ - Al<sub>2</sub>O<sub>3</sub> catalyst

**Table S3:** The reusability of the 8%Ni-20%Mo/ $\gamma$ - Al<sub>2</sub>O<sub>3</sub> over 2wt% sucrose at 180°C, 40bar H<sub>2</sub>, 4.5 h run time

| # of Run     | Product Selectivity (%) |            |            |             |             |             |
|--------------|-------------------------|------------|------------|-------------|-------------|-------------|
|              | 1,2-PD                  | 1,3-PD     | EG         | 1,2-BDO     | Lactic Acid | PDO+ EG+BDO |
| <b>Run 1</b> | <b>73.7</b>             | <b>2.6</b> | <b>2.5</b> | <b>12.3</b> | <b>1.8</b>  | <b>91.1</b> |
| <b>Run 2</b> | 73.2                    | 2.6        | 3.8        | 12.8        | 1.6         | 92.4        |
| <b>Run 3</b> | 70.0                    | 3.0        | 4.0        | 10.8        | 3.4         | 87.8        |
| <b>Run 4</b> | 61.8                    | 1.7        | 4.3        | 11.6        | 6.6         | 79.4        |

### 4. The reusability study of 8%Ni-20%Mo/ $\gamma$ - Al<sub>2</sub>O<sub>3</sub> at lower conversion

**Table S4:** The reusability of the 8%Ni-20%Mo/ $\gamma$ - Al<sub>2</sub>O<sub>3</sub> over 2wt% sucrose at 160°C, 40bar H<sub>2</sub>, 1 h run time

| # of Run     | Conversion  | Product Selectivity (%) |            |            |             |             |            |               |
|--------------|-------------|-------------------------|------------|------------|-------------|-------------|------------|---------------|
|              |             | 1,2-PD                  | 1,3-PD     | EG         | 1,2-BDO     | Lactic Acid | 1-PrOH     | PDO+ EG + BDO |
| <b>Run 1</b> | <b>54.7</b> | <b>69.0</b>             | <b>3.3</b> | <b>1.5</b> | <b>10.1</b> | <b>2.8</b>  | <b>2.1</b> | <b>83.9</b>   |
| <b>Run 2</b> | 54.4        | 71.3                    | 2.6        | 1.2        | 10.3        | 0.3         | 2.6        | 85.4          |
| <b>Run 3</b> | 57.7        | 69.9                    | 3.1        | 1.2        | 9.7         | 0.9         | 2.3        | 83.9          |

5. The XRD data of fresh and spent catalysts

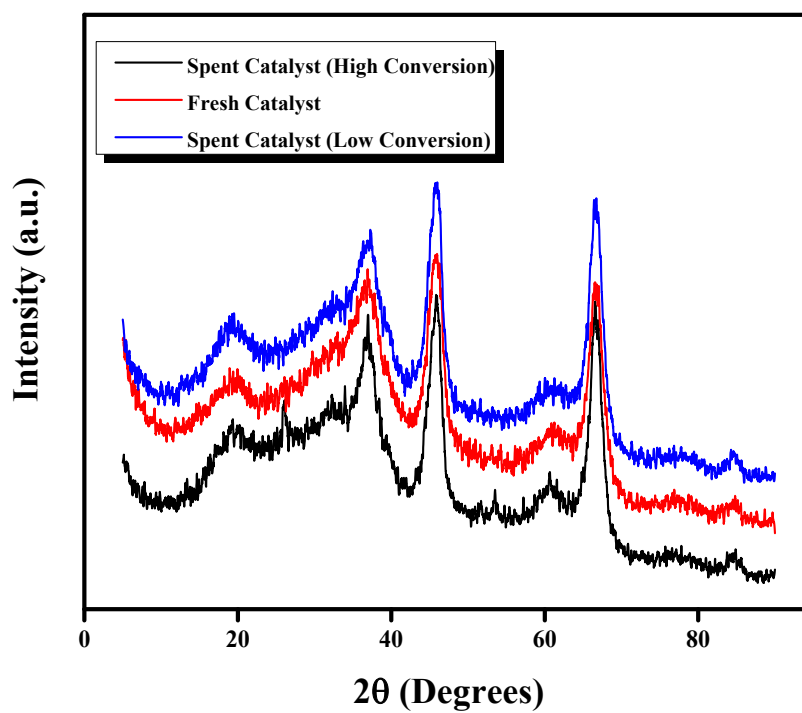

Figure S1: The XRD patterns of the fresh and spent catalyst at low conversion and high conversion

## 6. The morphology study of used and spent catalyst

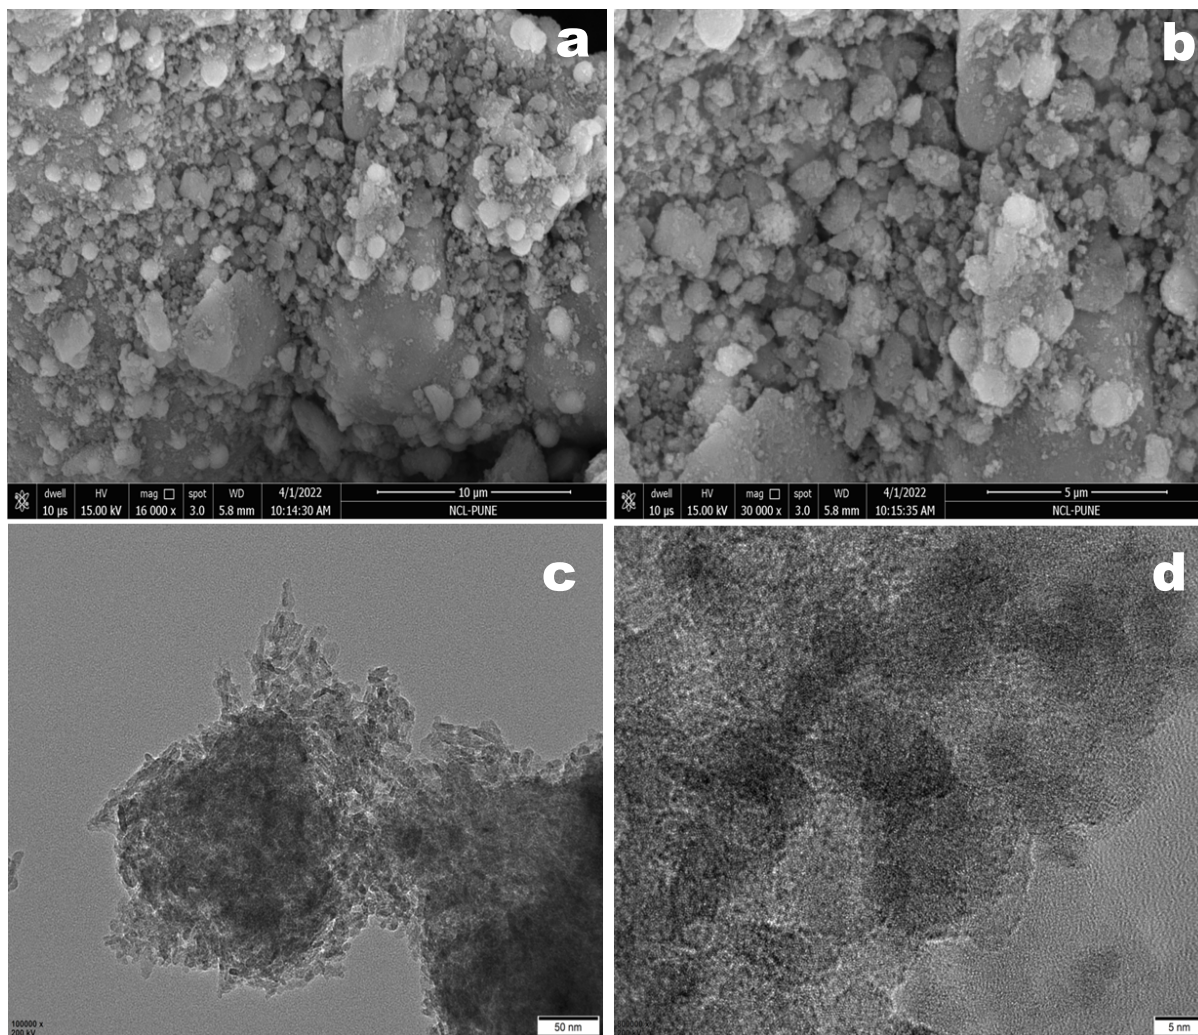

**Figure S2:** The morphology of the spent catalyst after 4 runs (a & b) FE-SEM (c & d) HR-TEM

7. The pyridine IR of various Ni-Mo/ $\gamma$ -Al<sub>2</sub>O<sub>3</sub> supported catalysts.

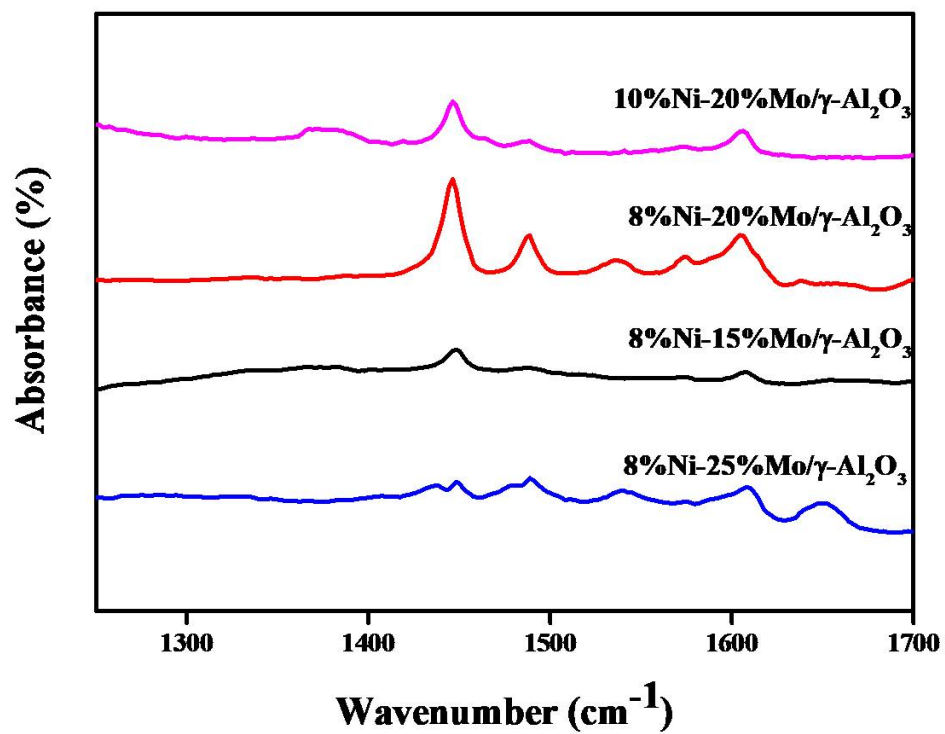

Figure S3 : The py-IR spectra of various  $\gamma$ -Al<sub>2</sub>O<sub>3</sub> supported catalysts

8. The deconvoluted XPS spectrum of Ni-2p and Mo-3d various Ni-Mo/ $\gamma$ -Al<sub>2</sub>O<sub>3</sub> catalysts.

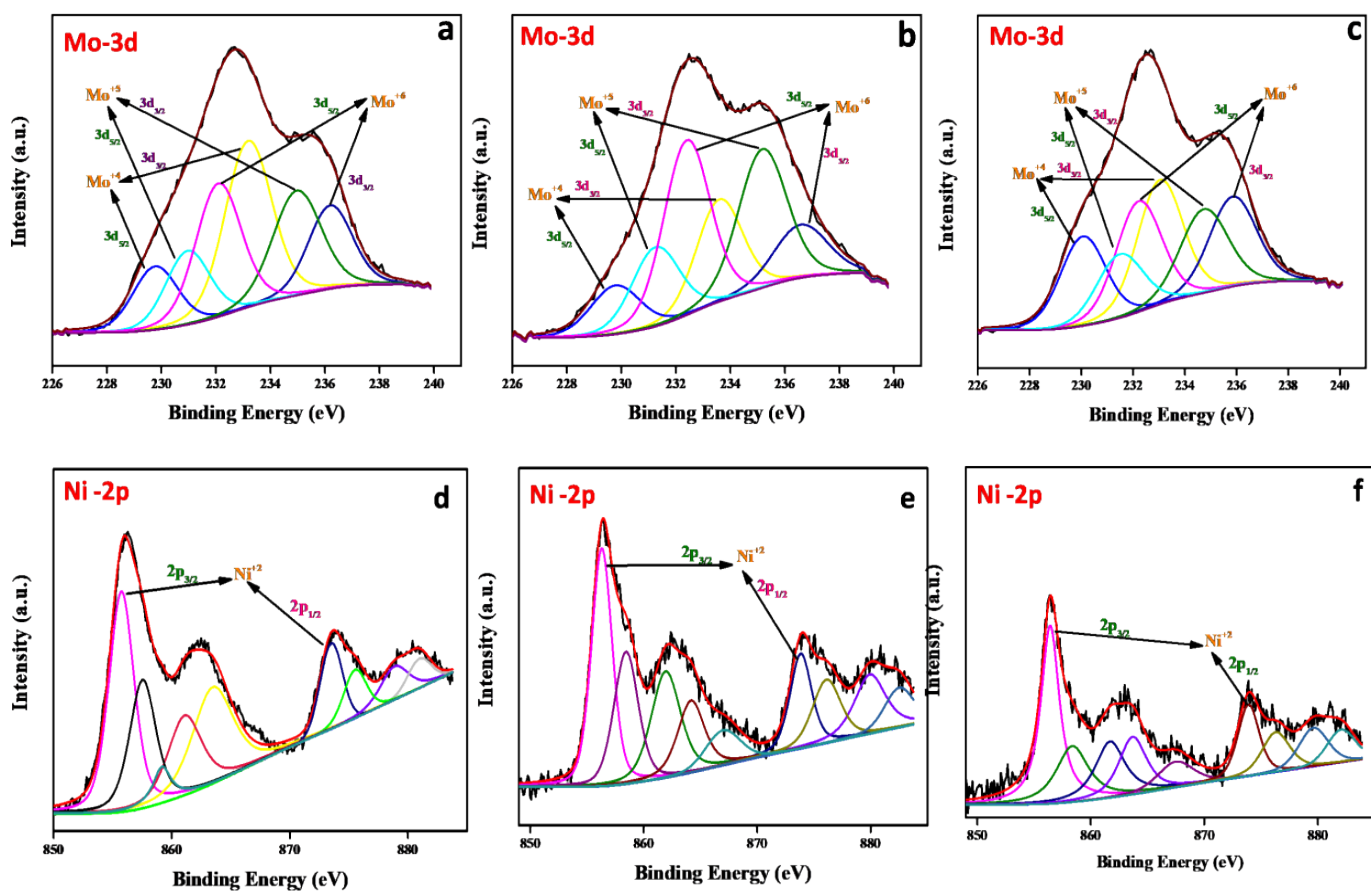

**Figure S4** : The deconvoluted XPS of (a) Mo-3d of 20%Mo/ $\gamma$ -Al<sub>2</sub>O<sub>3</sub> (b&e) Mo-3d & Ni-2p of 8%Ni-15%Mo/ $\gamma$ -Al<sub>2</sub>O<sub>3</sub> (c &f) Mo 3d & Ni 2p of 8%Ni - 25%Mo/ $\gamma$ -Al<sub>2</sub>O<sub>3</sub> (d) Ni-2p of 8%Ni/ $\gamma$ -Al<sub>2</sub>O<sub>3</sub>



9. The HPLC chromatogram of the activity study of the catalyst 8%Ni-20%Mo/ $\gamma$ - Al<sub>2</sub>O<sub>3</sub> at optimized reaction condition

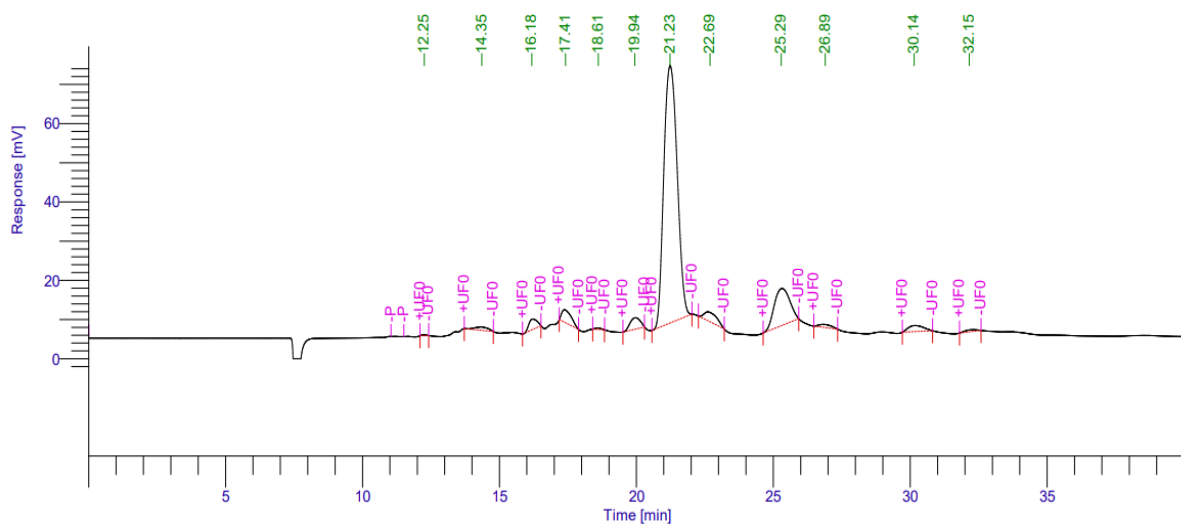

**Figure S5:** The HPLC chromatogram of the reaction of 8% Ni-20%Mo/ $\gamma$ - Al<sub>2</sub>O<sub>3</sub> over 2wt% sucrose at 180°C, 40 bar H<sub>2</sub>, 4.5 h at 1:0.3 sucrose: catalyst ratio

| Retention Time | Compound         |
|----------------|------------------|
| 21.23          | 1,2- Propanediol |
| 22.89          | 1,3-Propanediol  |
| 19.94          | 1,2-Ethandiol    |
| 25.29          | 1,2-Butanediol   |
| 16.18          | Lactic acid      |
| 32.15          | 1-Propanol       |
| 17.41          | Glycerol         |

10. The Calibration curve for the 1,2-propanediol

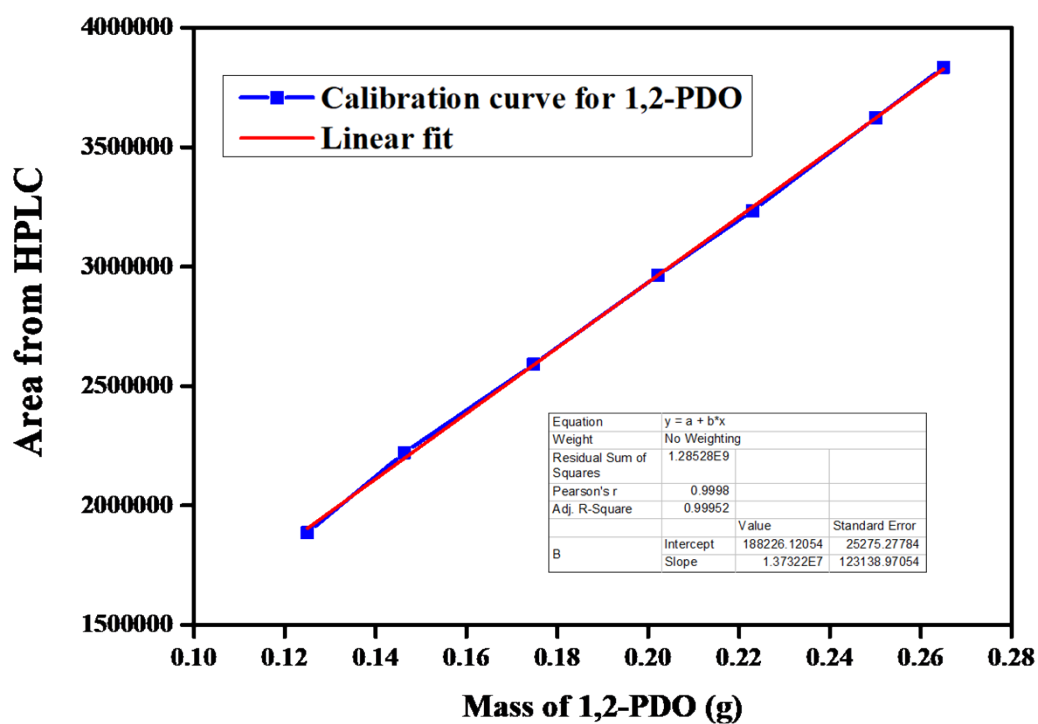

Figure S6: The calibration curve for 1,2-PDO
